# Supplementary material for: Two decades of pH T measurements along the GO-SHIP A25 section in the North Atlantic
Source: Copernicus journal article supplement (doi:10.5194/essd-18-801-2026), 2026-02-02
Supplement: Supplementary file 1 [file essd-18-801-2026-supplement.pdf]

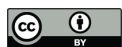

*Supplement of*

## **Two decades of $\text{pH}_T$ measurements along the GO-SHIP A25 section in the North Atlantic**

**Fiz F. Pérez et al.**

*Correspondence to:* Marta López-Mozos ([mlopezm@iim.csic.es](mailto:mlopezm@iim.csic.es)) and Antón Velo ([avelo@iim.csic.es](mailto:avelo@iim.csic.es))

The copyright of individual parts of the supplement might differ from the article licence.

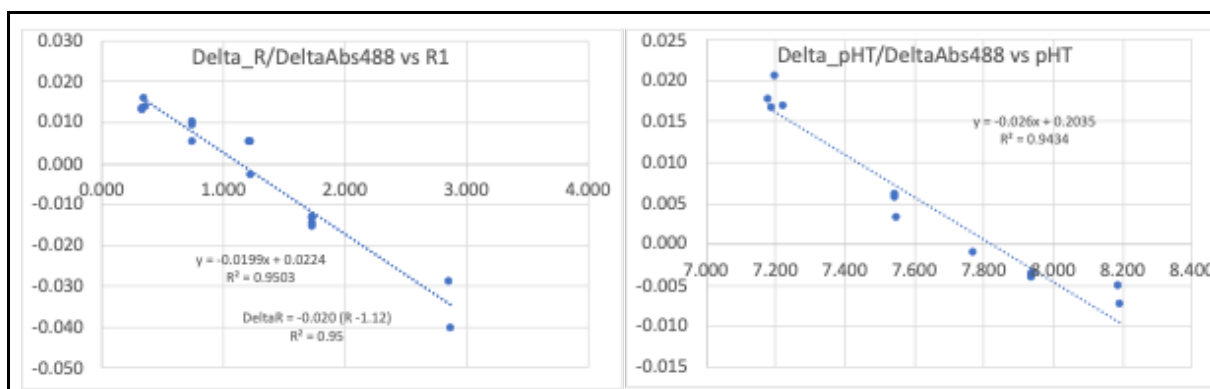

**Figure S1.** Examples of  $\Delta R/\Delta_{488A}$  vs  $R_1$  (left) and  $\Delta pH_T/\Delta_{488A}$  vs  $pH_{T,1}$  (right) based on the linear regressions obtained in 2023 cruise.

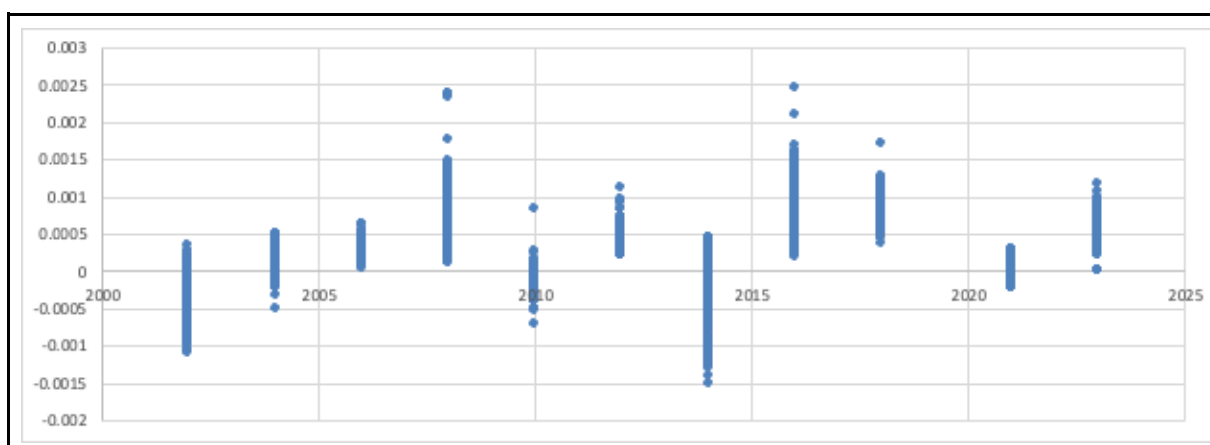

**Figure S2.** Difference in  $pH_{T, \text{corrected}}$  using  $\Delta R/\Delta_{488A}$  vs  $R_1$  correction or  $\Delta pH_T/\Delta_{488A}$  vs  $pH_{T,1}$ .

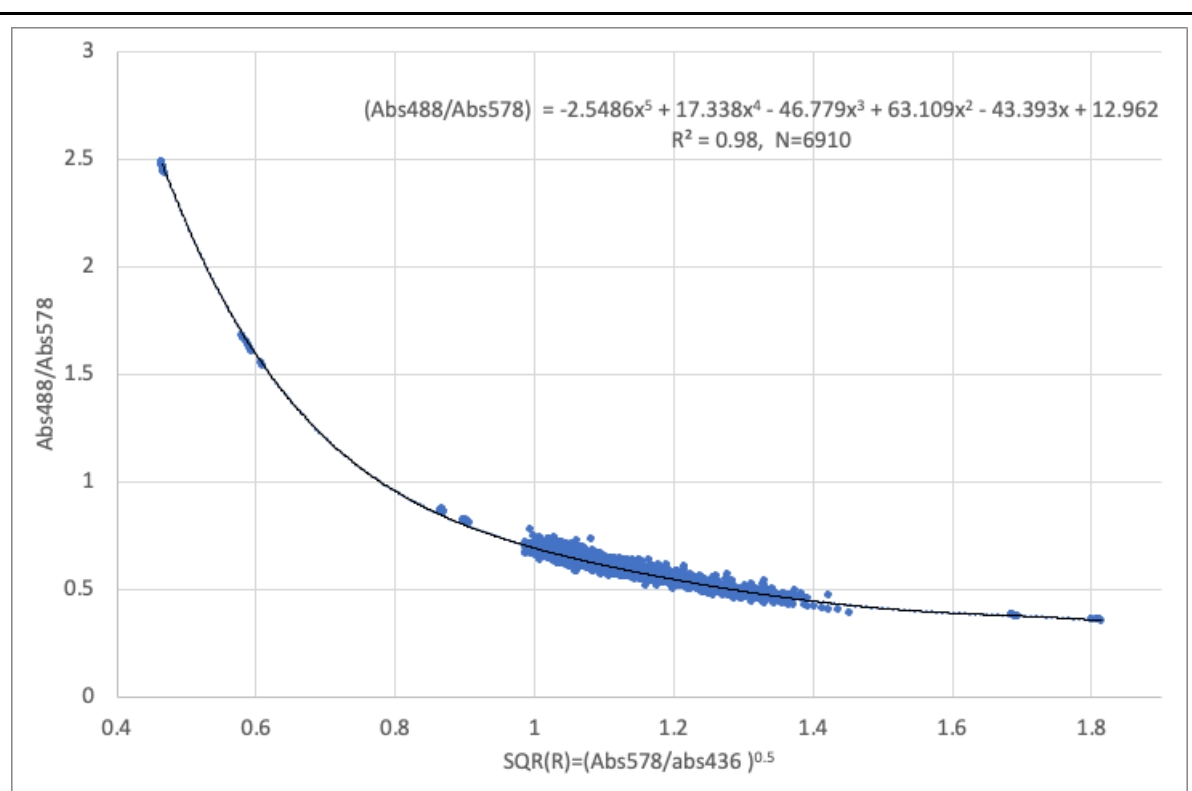

**Figure S3.** Polynomial fit of the  $_{488}\text{A} / _{578}\text{A}$  ratio to the square root of R.

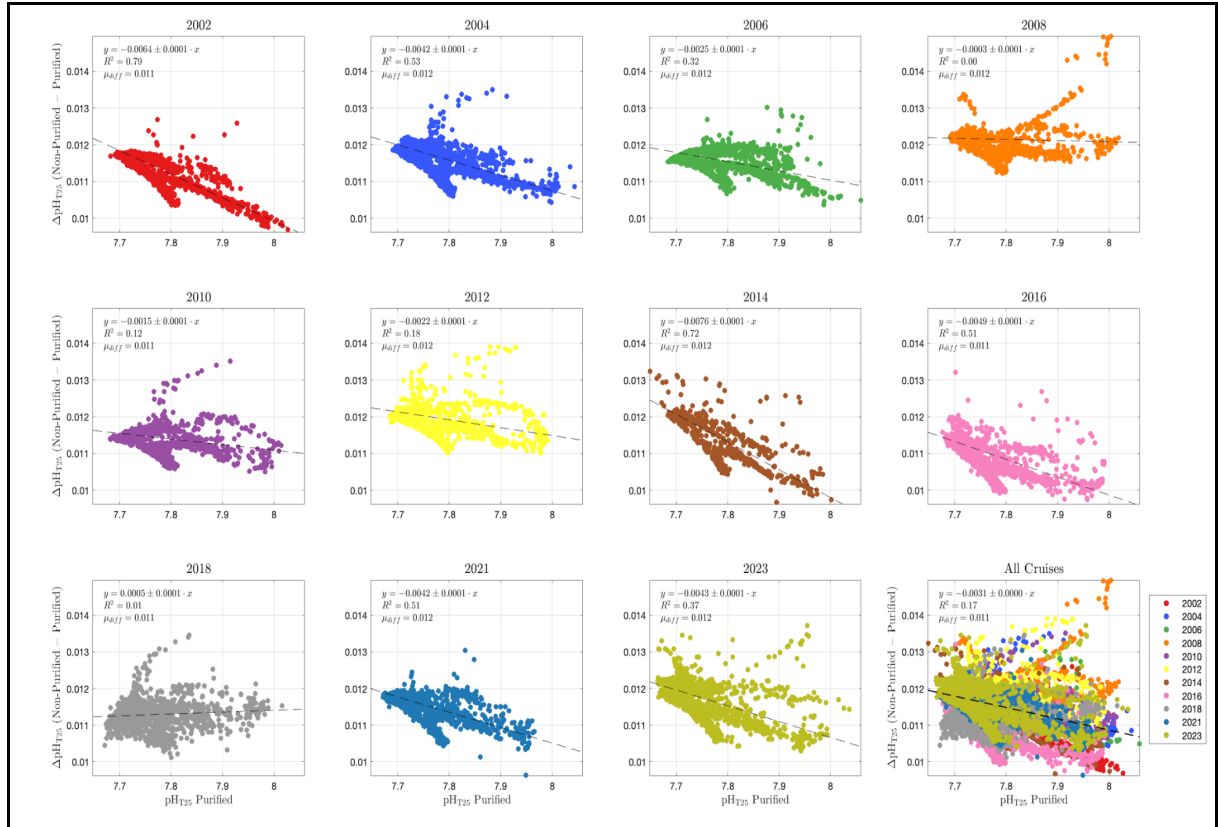

**Figure S4.** Linear regressions of the differences when applying CB'93 + DVD'98 (to R measured with unpurified dye) and the correction used in this study (see *Sect. 3.4*), versus  $\text{pH}_T$  for each OVIDE-BOCATS cruise, and all cruises together (last panel). Regression equations are displayed in each panel, along with their  $R^2$  and the mean difference.

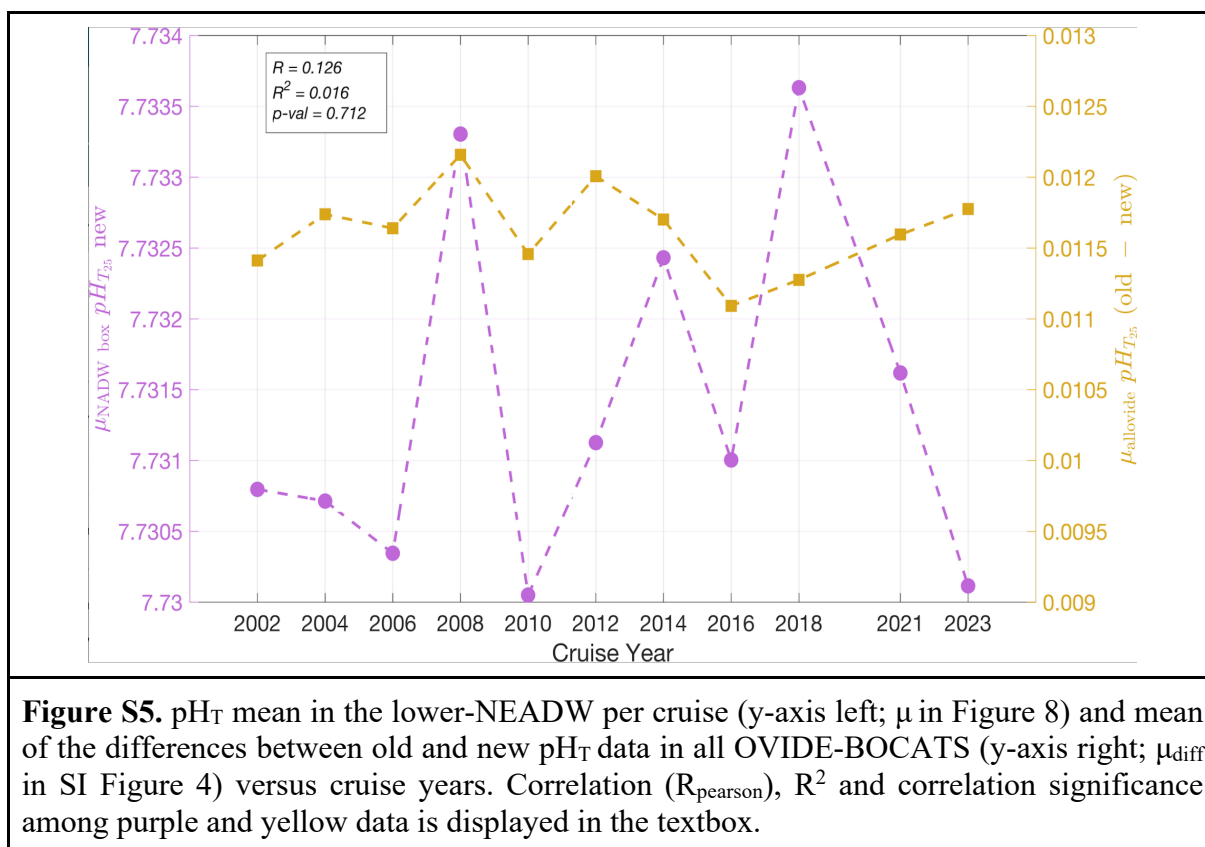

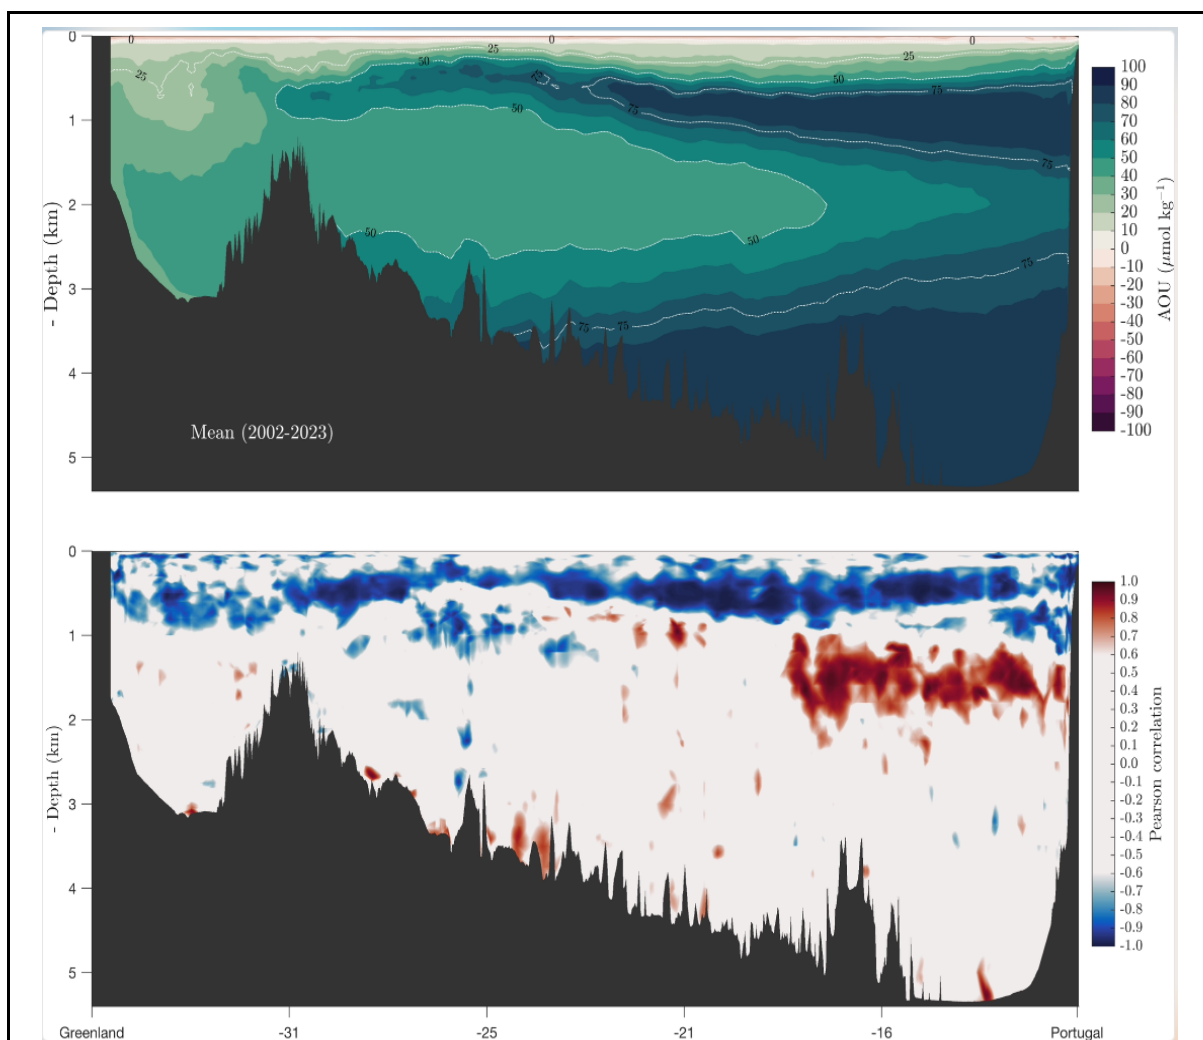

**Figure S6. (a)** Mean AOU ( $\mu\text{mol kg}^{-1}$ ) from 11 cruises (2002 to 2023) along the OVIDE-BOCATS section. **(b)** Spatial correlation ( $R_{\text{pearson}}$ ) from 2002 to 2023 between time-detrended  $\text{pH}_T$  and time-detrended AOU. Only significant correlations ( $p\text{-value} < 0.05$ ) are shown.

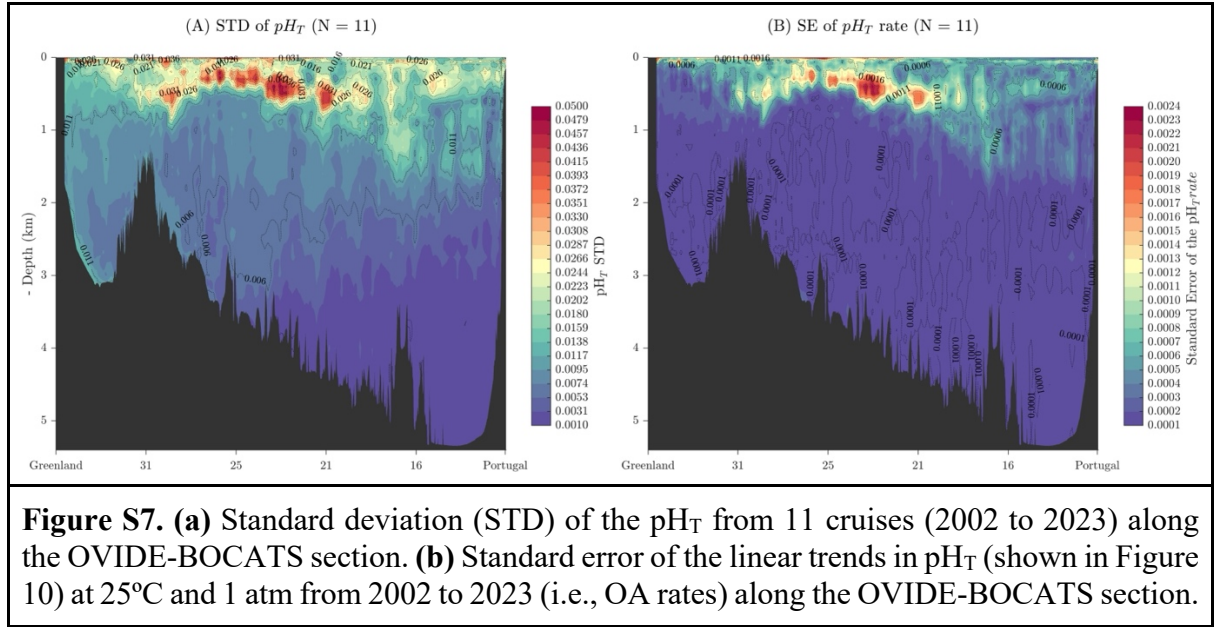

**Figure S7. (a)** Standard deviation (STD) of the pH<sub>T</sub> from 11 cruises (2002 to 2023) along the OVIDE-BOCATS section. **(b)** Standard error of the linear trends in pH<sub>T</sub> (shown in Figure 10) at 25°C and 1 atm from 2002 to 2023 (i.e., OA rates) along the OVIDE-BOCATS section.
